# Supplementary material for: Prognostic Impact of Diabetes on Long-term Survival Outcomes in Patients With Heart Failure: A Meta-analysis
Source: Oxford University Press journal article supplement (doi:10.2337/dc17-0697), 2017-10-12
Supplement: dc170697supplementarydata.pdf [file dc170697supplementarydata.pdf]

SUPPLEMENTARY DATA

**Manuscript Title: Prognostic impact of diabetes mellitus on long-term survival outcomes in patients with heart failure. A meta-analysis.**

Dauriz M *et al.*

**Supplementary Figure S1. Study flow-chart: the MOOSE flow diagram.**

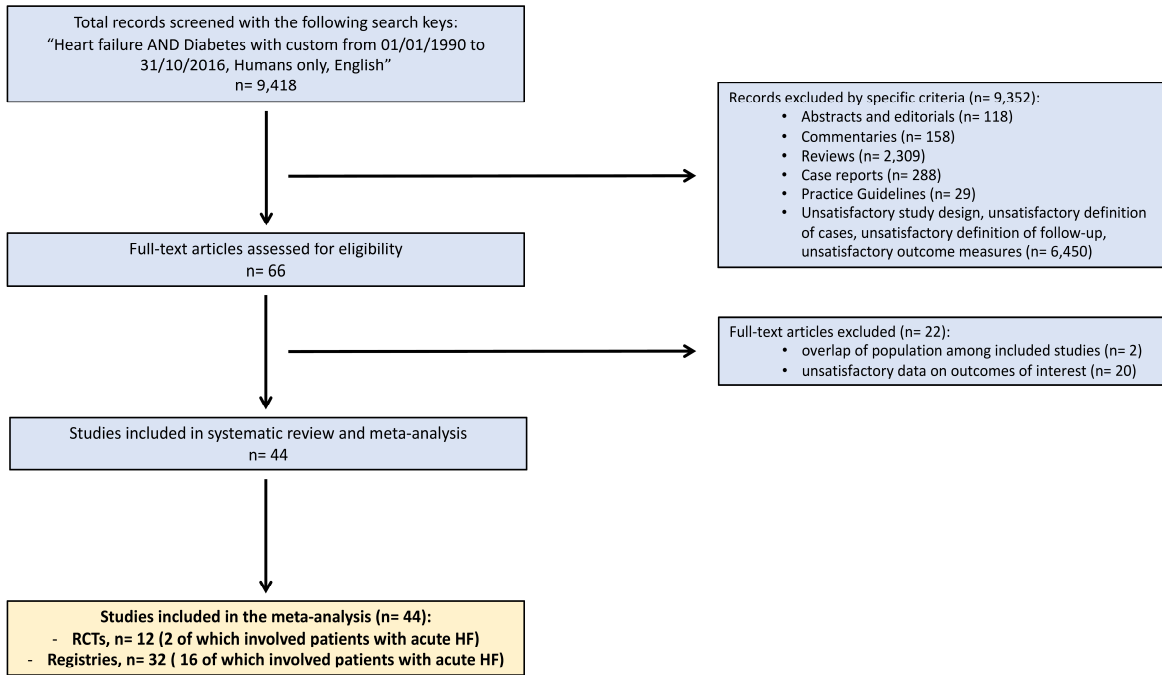

SUPPLEMENTARY DATA

Supplementary Figure S2. Funnel plot of standard error by Log odds ratio for all-cause death (panel A), cardiovascular death (panel B) and hospitalization (panel C). Egger's regression test:  $P$ -value=0.430, 0.497 and 0.857, respectively.

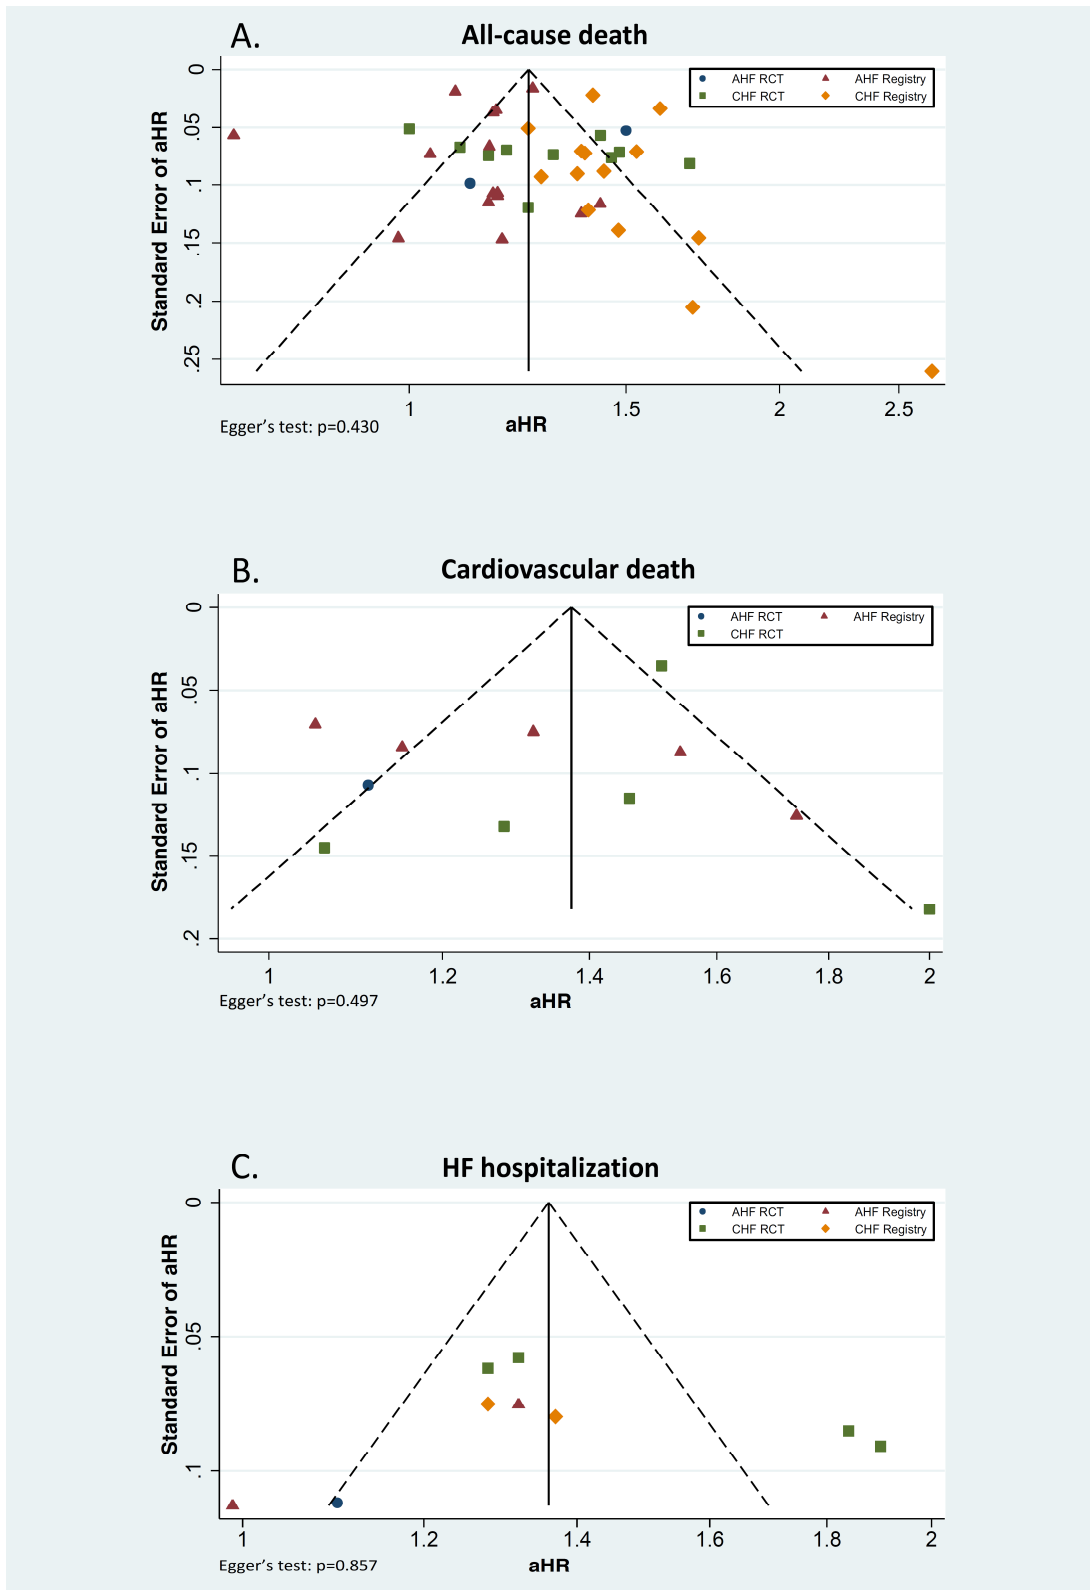

SUPPLEMENTARY DATA

**Supplementary Table S1. Main characteristics of randomized clinical trials and registries assessing the impact of diabetes mellitus on the risk of all-cause death, cardiovascular death, hospitalization and the combined endpoint of all-cause death or hospitalization in patients with acute HF.**

| Author [Ref.], Year                              | Study Characteristics                                                                                                                                                  | Follow-up length   | Diagnostic criteria for HF                 | Diagnosis of DM; prevalence of DM                                                                                                                                                    | Mean LVEF (%); proportion of patients with LVEF>35% | Total number of all-cause deaths | Covariate Adjustment                                                                                                                                                                                                                                                                                                                                                                                                                       | Main findings by outcomes (unadjusted or adjusted HRs [ $\pm$ 95% CI])                                                                                                  | Degree of adjustment\$ |
|--------------------------------------------------|------------------------------------------------------------------------------------------------------------------------------------------------------------------------|--------------------|--------------------------------------------|--------------------------------------------------------------------------------------------------------------------------------------------------------------------------------------|-----------------------------------------------------|----------------------------------|--------------------------------------------------------------------------------------------------------------------------------------------------------------------------------------------------------------------------------------------------------------------------------------------------------------------------------------------------------------------------------------------------------------------------------------------|-------------------------------------------------------------------------------------------------------------------------------------------------------------------------|------------------------|
| <b>Randomized Clinical Trials (RCTs)</b>         |                                                                                                                                                                        |                    |                                            |                                                                                                                                                                                      |                                                     |                                  |                                                                                                                                                                                                                                                                                                                                                                                                                                            |                                                                                                                                                                         |                        |
| Gustafsson I <i>et al.</i> <sup>1</sup> , 2004   | RCT: The DIAMOND Study, n=5,491 (59.8% men) Danish patients consecutively hospitalized with new or worsening HF. Mean age 73 years                                     | From 5 to 8 years  | Clinical; echocardiographic                | Medical records; the prevalence of DM was 16.4%                                                                                                                                      | NA                                                  | 3,955                            | Age, sex, smoking status, IHD, hypertension, AF, NYHA class, wall motion index                                                                                                                                                                                                                                                                                                                                                             | DM was an independent risk factor for all-cause death (aHR 1.50 [1.30-1.60])                                                                                            | ***                    |
| Deedwania PC <i>et al.</i> <sup>2</sup> , 2011   | RCT: The EPHEBUS Trial, n=2,238 (68.8% men) multinational patients with acute HF. Mean age 66 years                                                                    | 1.3 years (median) | Clinical; echocardiographic                | Physician diagnosis; the prevalence of DM was 50.0%                                                                                                                                  | Mean LVEF 33%                                       | 403                              | Age, sex, race, smoking status, Q-wave index, time to randomization, revascularization, IHD, history of HF, HF hospitalization, hypertension, medications, Killip-class, BMI, SBP, DBP, heart rate, electrolytes, LVEF, creatinine, urea, glucose, uric acid, total bilirubin, alkaline phosphatase, LDH, liver enzymes, albumin, total protein, total cholesterol, triglycerides, hemoglobin, WBC, platelets, red blood cells, hematocrit | DM was an independent risk factor for CV death (aHR 1.11 [0.90-1.37]) and CV hospitalization (aHR 1.11 [0.90-1.37]), but not for all-cause death (aHR 1.12 [0.93-1.37]) | ***                    |
| <b>Observational Registries</b>                  |                                                                                                                                                                        |                    |                                            |                                                                                                                                                                                      |                                                     |                                  |                                                                                                                                                                                                                                                                                                                                                                                                                                            |                                                                                                                                                                         |                        |
| Varela-Roman A <i>et al.</i> <sup>3</sup> , 2005 | Registry: n= 1,659 (59.9% men) Spanish patients hospitalized for acute HF between 1991 and 2002 in the Cardiology Department of a tertiary hospital. Mean age 69 years | 3.13 years         | Clinical; radiologic (Framingham criteria) | Use of insulin and/or oral glucose-lowering agents, or fasting glucose levels >7mmol/L, or random glucose levels >11.1 mmol/L during hospitalization; the prevalence of DM was 26.6% | Patients with LVEF>35% were 39.7%                   | 846                              | Age, sex, hypertension, hyperlipidaemia, NYHA class, LVEF, AF, alveolar oedema, jugular vein distension                                                                                                                                                                                                                                                                                                                                    | DM was an independent risk factor for all-cause death (aHR 1.43 [1.14-1.80])                                                                                            | **                     |

## SUPPLEMENTARY DATA

|                                                 |                                                                                                                                                                    |                    |                                            |                                                                                                                                                                                         |                                                    |        |                                                                                                                                                                                                                                                                 |                                                                                                                                                       |     |
|-------------------------------------------------|--------------------------------------------------------------------------------------------------------------------------------------------------------------------|--------------------|--------------------------------------------|-----------------------------------------------------------------------------------------------------------------------------------------------------------------------------------------|----------------------------------------------------|--------|-----------------------------------------------------------------------------------------------------------------------------------------------------------------------------------------------------------------------------------------------------------------|-------------------------------------------------------------------------------------------------------------------------------------------------------|-----|
| Owan TE <i>et al.</i> <sup>4</sup> , 2006       | Registry:<br>n= 6,076 (55.4% men)<br>American consecutive patients hospitalized with decompensated heart failure at Mayo Clinic Hospitals.<br>Mean age 72.9 years  | 15 years           | Clinical; radiologic (Framingham criteria) | Medical records; the prevalence of DM was 33.7%                                                                                                                                         | Patients with LVEF>35% were 47.1%                  | 3,691  | Age, sex, creatinine, hemoglobin, hypertension, IHD, valve disease, year of admission, HFpEF                                                                                                                                                                    | DM was an independent risk factor for all-cause death (aHR 1.09 [1.05-1.13])                                                                          | *** |
| Varadarajan P <i>et al.</i> <sup>5</sup> , 2006 | Registry:<br>n= 2,246 (52% men)<br>American patients with a discharge diagnosis of acute HF in a large tertiary care hospital from 1990 to 1999. Mean age 69 years | 5 years (median)   | Clinical; radiologic (Framingham criteria) | Fasting glucose levels >7 mmol/L or use of insulin and/or oral glucose-lowering agents; the prevalence of DM was 30%                                                                    | Patients with LVEF>35% were 48%                    | 1,613  | Age, sex, hemoglobin, LVEF, hypertension, IHD, CKD, medications                                                                                                                                                                                                 | DM was not an independent risk factor for all-cause death (aHR 1.17 [0.95-1.44])                                                                      | *** |
| Ouzounian M <i>et al.</i> <sup>6</sup> , 2007   | Registry:<br>n= 7,816 (48% men)<br>Canadian patients discharged with a primary diagnosis of acute HF. Mean age 76 years                                            | 2 years            | Clinical                                   | Medical records; the prevalence of DM was 44.9%                                                                                                                                         | Median LVEF 40%; patients with LVEF>35% were 88.2% | 2,841  | Age, sex, smoking status, hyperlipidemia, peripheral vascular disease, creatinine, medications                                                                                                                                                                  | DM was not an independent risk factor for all-cause death (aHR 1.16 [0.93-1.46])                                                                      | *** |
| MacDonald MR <i>et al.</i> <sup>7</sup> , 2008  | Registry:<br>n= 116,556 (47.3% men)<br>Scottish patients admitted to the hospital for the first time with HF between 1986 and 2003. Mean age 73 years              | 5 years            | ICD codes                                  | Medical records; the prevalence of DM was 13%                                                                                                                                           | NA                                                 | 34,369 | Age, main comorbidities, year of admission, deprivation index                                                                                                                                                                                                   | DM was an independent risk factor for all-cause death (aHR 1.26 [1.22-1.30]) and was associated with a lower in-hospital death (aHR 0.84 [0.78-0.89]) | **  |
| Barsheshet A <i>et al.</i> <sup>8</sup> , 2010  | Registry:<br>HFIS<br>n= 2,336 (55.2% men)<br>Israeli patients with acute HF.<br>Mean age 75 years                                                                  | Up to 4 years      | Clinical; echocardiographic                | Medical records, admission fasting glucose levels $\geq 11.1$ mmol/L, or use of insulin and/or oral glucose-lowering agents (on admission or discharge); the prevalence of DM was 51.6% | NA                                                 | 1,403  | Age, sex, IHD, AF, NYHA class, eGFR, SBP, Na, anemia, admission to an intensive care unit, etiology of HF, history of stroke, COPD, malignancy, hepatic cirrhosis, medications                                                                                  | DM was not an independent risk factor for in-hospital death (aHR 1.37 [0.71-2.71]) and for all-cause death (aHR 1.19 [0.90-1.60])                     | *** |
| Harjola VP <i>et al.</i> <sup>9</sup> , 2010    | Registry:<br>EHFS-II,<br>n= 2,981 (61.3% men)<br>European patients with acute HF.<br>Mean age 71.7 years                                                           | 1.02 year (median) | Clinical                                   | Medical records; the prevalence of DM was 33.1%                                                                                                                                         | Mean LVEF 34.6%                                    | 542    | Age, living in special accommodation, acute decompensated chronic heart failure, history of IHD, valvular heart disease, stroke/TIA, hypertension, AF/flutter, QRS interval, creatinine, SBP, peripheral pitting oedema, anaemia, Na, length of hospitalization | DM was an independent risk factor for all-cause death (aHR 1.38 [1.08-1.76])                                                                          | *** |
| Shah R <i>et al.</i> <sup>10</sup> , 2014       | Registry:<br>The GREAT Registry,<br>n= 6,142 (55.8% men)                                                                                                           | 1 year             | Clinical; echocardiographic                | Medical records, or use of insulin and/or oral glucose-lowering agents;                                                                                                                 | Mean LVEF 39.6%                                    | 1,269  | Age, sex, BMI, eGFR, SBP, DBP, heart rate, Na, history of HF, IHD, AF                                                                                                                                                                                           | DM was not an independent risk factor for all-cause death (aHR 1.18                                                                                   | **  |

SUPPLEMENTARY DATA

|                                                 |                                                                                                                                                |                    |                                                         |                                                                                                                                                             |                                                  |       |                                                                                                                                                  |                                                                                                                                    |     |
|-------------------------------------------------|------------------------------------------------------------------------------------------------------------------------------------------------|--------------------|---------------------------------------------------------|-------------------------------------------------------------------------------------------------------------------------------------------------------------|--------------------------------------------------|-------|--------------------------------------------------------------------------------------------------------------------------------------------------|------------------------------------------------------------------------------------------------------------------------------------|-----|
|                                                 | multinational patients with acute decompensated HF. Mean age 73.4 years                                                                        |                    |                                                         | the prevalence of DM was 38.3%                                                                                                                              |                                                  |       |                                                                                                                                                  | [0.96-1.46])                                                                                                                       |     |
| AlHabib K.F. <i>et al.</i> <sup>11</sup> , 2014 | Registry: The HEARTS, n=2,610 (65.8% men) Arabs patients with acute decompensated HF admitted to 18 hospitals. Median age 61.4 years           | 3 years            | Clinical; echocardiographic; NT-proBNP                  | Medical records; the prevalence of DM was 64.1%                                                                                                             | Patients with LVEF>35% were 27.1%                | 634   | None                                                                                                                                             | DM was not an independent risk factor for all-cause death (uHR 1.04 [0.90-1.20])                                                   |     |
| Teng TH <i>et al.</i> <sup>12</sup> , 2015      | Registry: n= 16,366 (58.3% men) Australian non-Aboriginal patients hospitalized for acute HF. Mean age 71 years                                | 1 year             | ICD codes; clinical; echocardiographic                  | Medical records; the prevalence of DM was 30.7%                                                                                                             | NA                                               | 3,051 | Age, sex, Charlson comorbidity index, hypertension, AF, rheumatic/valvular heart disease, CKD, IHD, cerebrovascular disease, history of PCI/CABG | DM was associated with a lower all-cause death (aHR 0.72 [0.64-0.80])                                                              | **  |
| Helfand BK <i>et al.</i> <sup>13</sup> , 2015   | Registry: n= 9,748 (43.9% men) American patients hospitalized for acute decompensated HF. Mean age 76 years                                    | Up to 10 years     | ICD-9 codes; clinical; radiologic (Framingham criteria) | Medical records, or use of insulin and/or oral glucose-lowering agents at admission; the prevalence of DM was 39%                                           | NA                                               | 4083  | Age, sex, presenting symptoms, SBP, heart rate, eGFR                                                                                             | DM was an independent risk factor for all-cause death (aHR 1.17 [1.09-1.26]) but not for in-hospital death (aHR 1.03 [0.86-1.24])  | **  |
| Khafaji HA <i>et al.</i> <sup>14</sup> , 2015   | Registry: The Gulf CARE Registry, n= 5,005 (62.5% men) Arabian patients with acute HF. Mean age 60 years                                       | 1 year             | Clinical; echocardiographic                             | Medical records, or use of insulin and/or oral glucose-lowering agents, or fasting glucose levels >7 mmol/L, or HbA1c ≥6.5%; the prevalence of DM was 49.8% | Mean LVEF 37%; patients with LVEF>35% were 51.2% | 313   | Age, sex, CKD, COPD, asthma, STEMI, LVEF, valvular heart disease, stroke, peripheral vascular disease                                            | DM was not an independent risk factor for in-hospital death (aHR 1.06 [0.79-1.41]) and for all-cause death (aHR 1.18 [0.95-1.46])  | **  |
| Spinar J <i>et al.</i> <sup>15</sup> , 2016     | Registry: The AHEAD Network Registry, n= 5,846 (56.6% men) Czech consecutive patients hospitalized for acute HF. Mean age 72 years             | 2.75 year (median) | Clinical; echocardiographic                             | Medical records; the prevalence of DM was 44%                                                                                                               | Mean LVEF 37%                                    | 1,888 | Age, sex, AF, hypertension, COPD, IHD, creatinine, Na, anemia                                                                                    | DM was an independent risk factor for all-cause death (aHR 1.18 [1.09-1.26])                                                       | **  |
| Targher G <i>et al.</i> <sup>16</sup> , 2016    | Registry: IN-HF Outcome Registry, n= 1,776 (60.2% men) Italian patients hospitalized with acute HF (worsening or de novo). Mean age 72.2 years | 1 year             | Clinical; echocardiographic                             | Medical records, or use of insulin and/or oral glucose-lowering agents; the prevalence of DM was 42.4%                                                      | Mean LVEF 37%                                    | 428   | Age, sex, SBP, eGFR, LVEF, HF etiology, HF worsening/de novo presentation                                                                        | DM was an independent risk factor for in-hospital death (aHR 1.86 [1.01-3.42]), but not for all-cause death (aHR 0.98 [0.74-1.31]) | *** |
| Targher G <i>et al.</i> <sup>17</sup> , 2017    | Registry: The ESC-HFA HF Long-Term Registry, n= 6,926 (62.9% men)                                                                              | 1 year             | Clinical; echocardiographic; NT-proBNP                  | Medical records, or use of insulin and/or oral glucose-lowering agent, or fasting glucose levels                                                            | Mean LVEF 39.2%; patients with                   | 1,781 | Age, sex, BMI, SBP, eGFR, LVEF, HF etiology, HF presentation, smoking status, hypertension, previous stroke,                                     | DM was an independent risk factor for in-hospital death (aHR 1.78 [1.28-2.46]), HF hospitalization                                 | *** |

## SUPPLEMENTARY DATA

|                                                                 |  |  |                                                            |                     |  |                                    |                                                                       |  |
|-----------------------------------------------------------------|--|--|------------------------------------------------------------|---------------------|--|------------------------------------|-----------------------------------------------------------------------|--|
| European hospitalized patients with acute HF. Mean age 69 years |  |  | ≥7.0 mmol/L or HbA1c ≥6.5%; the prevalence of DM was 49.4% | LVEF>35% were 29.8% |  | COPD, haemoglobin, Na, medications | (aHR 1.32 [1.14-1.53]) and for all-cause death (aHR 1.16 [1.02-1.32]) |  |
|-----------------------------------------------------------------|--|--|------------------------------------------------------------|---------------------|--|------------------------------------|-----------------------------------------------------------------------|--|

**Note:** §Degree of adjustment: 0 unadjusted; \*adjusted for age and/or sex; \*\*adjustment for age, sex, blood pressure, HF etiology and LVEF; \*\*\*, further adjustment for traditional and/or non-traditional CVD risk factors.  
**Abbreviations:** AF, atrial fibrillation; AHF, acute heart failure; aHR, adjusted hazard ratio; BMI, body mass index; COPD, chronic obstructive pulmonary disease; CKD, chronic kidney disease; CV, cardiovascular; DBP, diastolic blood pressure; DM diabetes mellitus; eGFR, estimated glomerular filtrate rate; HbA1c, hemoglobin A1c; HF, heart failure; HFpEF, heart failure with preserved ejection fraction; IHD, ischemic heart disease; LVEF, left ventricular ejection fraction; LDH, lactate dehydrogenase; Na, sodium; NA, not available; NT-proBNP, N-terminal probrain natriuretic peptide; RCT, randomized controlled trial; SBP, systolic blood pressure; TIA, transient ischaemic attack; WBC, white blood cell, uHR, unadjusted hazard ratio.

### Supplementary Table S2. Main characteristics of randomized clinical trials (RCTs) and registries assessing the impact of diabetes mellitus (DM) on the risk of all-cause death, cardiovascular death, hospitalization and the combined endpoint of all-cause death or hospitalization in patients with chronic HF.

| Author [Ref.], Year                                | Study Characteristics                                                                                                                 | Follow-up length    | Diagnostic criteria for HF  | Diagnosis of DM; prevalence of DM                                                                                                             | Mean LVEF (%); proportion of patients with LVEF >35% | Total number of all-cause deaths | Covariate Adjustment                                                                                                                                                                                                              | Main findings by outcomes (unadjusted or adjusted HRs [±95% CI])                                                                                                                                                                       | Degree of adjustment§ |
|----------------------------------------------------|---------------------------------------------------------------------------------------------------------------------------------------|---------------------|-----------------------------|-----------------------------------------------------------------------------------------------------------------------------------------------|------------------------------------------------------|----------------------------------|-----------------------------------------------------------------------------------------------------------------------------------------------------------------------------------------------------------------------------------|----------------------------------------------------------------------------------------------------------------------------------------------------------------------------------------------------------------------------------------|-----------------------|
| <b>Randomized Clinical Trials (RCTs)</b>           |                                                                                                                                       |                     |                             |                                                                                                                                               |                                                      |                                  |                                                                                                                                                                                                                                   |                                                                                                                                                                                                                                        |                       |
| Torp-Pedersen C <i>et al.</i> <sup>18</sup> , 2007 | RCT:<br>The COMET Study,<br>n= 3,029 (79.7% men)<br>American patients with chronic HF.<br><br>Mean age: 62 years                      | From 3.9 to 6 years | Clinical; echocardiographic | Medical records, or use of insulin and/or oral glucose-lowering agents, or random glucose levels >11.1 mmol/L; the prevalence of DM was 24.1% | Mean LVEF 26%                                        | 1,157                            | Age, sex, SBP, NYHA class, duration of HF, LVEF, previous IHD, stroke, AF, hemoglobin, Na, creatinine, medications,                                                                                                               | DM was an independent risk factor for all-cause death (aHR 1.20 [1.05-1.38])                                                                                                                                                           | ***                   |
| MacDonald MR <i>et al.</i> <sup>19</sup> , 2008    | RCT:<br>CHARM Trial,<br>n= 7,599 (68.4% men)<br>American and Canadian patients with symptomatic chronic HF.<br><br>Mean age: 66 years | 3.14 years (median) | Clinical; echocardiographic | Medical records, or use of insulin and/or oral glucose-lowering agents; the prevalence of DM was 28.5%                                        | Percentage of patients with LVEF>35% was 39.8%       | 1,831                            | Age, sex, BMI, NYHA class, LVEF, heart rate, SBP, DBP, HF hospitalization, previous IHD, current angina, stroke, hypertension, AF, pacemaker, implantable cardioverter defibrillator, smoking status, PCI, CAGB, previous cancer, | DM was an independent risk factor for all-cause death (aHR 1.69 [1.43-1.97]), CV death (aHR 1.74 [1.32-2.16]), HF hospitalization (aHR 1.84 [1.54-2.15]) and for the combined of CV death or HF hospitalization (aHR 1.80 [1.55-2.05]) | ***                   |

## SUPPLEMENTARY DATA

|                                                  |                                                                                                                                       |                    |                                              |                                                                                                                     |                    |       | medications                                                                                                                                                                            |                                                                                                                                                                                                                   |     |
|--------------------------------------------------|---------------------------------------------------------------------------------------------------------------------------------------|--------------------|----------------------------------------------|---------------------------------------------------------------------------------------------------------------------|--------------------|-------|----------------------------------------------------------------------------------------------------------------------------------------------------------------------------------------|-------------------------------------------------------------------------------------------------------------------------------------------------------------------------------------------------------------------|-----|
| Wedel H <i>et al.</i> <sup>20</sup> , 2009       | RCT:<br><br>CORONA Study,<br><br>n= 3,342 (74.8% men)<br>European patients with<br>chronic HF.<br><br>Mean age: 72.5 years            | 3 years            | Clinical;<br>echocardiographic               | Medical records; the<br>prevalence of DM was 29%                                                                    | Mean LVEF<br>31%   | 934   | Age, sex, BMI, LVEF, NYHA<br>class, CABG, AF, ApoA-1,<br>NT-proBNP creatinine,<br>intermittent claudicatio,<br>heart rate, IHD                                                         | DM was an independent risk<br>factor for all-cause death<br>(aHR 1.31 [1.13-1.51])                                                                                                                                | *** |
| de Boer RA <i>et al.</i> <sup>21</sup> ,<br>2010 | RCT<br><br>SENIORS Trial,<br><br>n= 2,128 (26% men)<br>European patients with<br>chronic HF. Mean age:<br>76.1 years                  | 1.75<br>years      | Clinical;<br>echocardiographic               | Medical records, or use of<br>insulin and/or oral glucose-<br>lowering agents; the<br>prevalence of DM was<br>26.1% | Mean LVEF<br>33%   | 361   | Age, sex, LVEF, NYHA<br>class, creatinine, blood<br>pressure, medications,<br>hypertension, and<br>previous IHD                                                                        | DM was an independent risk<br>factor for the combined of<br>all-cause death or CV<br>hospitalization (aHR 1.36<br>[1.15-1.60]), but not for all-<br>cause death (aHR 1.25 [0.99-<br>1.58])                        | *** |
| Komajda M <i>et al.</i> <sup>22</sup> ,<br>2011  | RCT:<br><br>The I-PRESERVE Trial,<br><br>n= 4,128 (39.7% men)<br>multinational patients<br>with chronic HF.<br><br>Mean age: 72 years | Up to 5.5<br>years | Clinical;<br>echocardiographic;<br>NT-proBNP | Medical records; the<br>prevalence of DM was 27%                                                                    | Mean LVEF<br>59%   | 881   | Age, LVEF, heart rate,<br>neutrophiles count, NT-<br>proBNP, hospitalization for<br>HF, quality of life, COPD<br>asthma, eGFR, HF etiology,<br>IHD                                     | DM was an independent risk<br>factor for all-cause death<br>(aHR 1.48 [1.29-1.71]) and<br>for the combined of all-cause<br>death or CV hospitalization<br>(aHR 1.43 [1.29-1.60])                                  | *** |
| Sarma S <i>et al.</i> <sup>23</sup> , 2013       | RCT:<br><br>The EVEREST Study,<br><br>n= 4,113 (74.4% men)<br>multinational patients<br>with HF.<br><br>Mean age: 65 years            | Up to 2.5<br>years |                                              | Medical records, or use of<br>insulin and/or oral glucose-<br>lowering agents; the<br>prevalence of DM was<br>40.1% | Mean LVEF<br>28%   | 1,092 | Age, sex, BMI, LVEF, Na,<br>blood urea nitrogen, SBP,<br>QRS interval, NT-proBNP,<br>geographical region,<br>smoking status, AF, flutter,<br>hypertension, CKD, stroke,<br>medications | DM was an independent risk<br>factor for all-cause death<br>(aHR 1.16 [1.00-1.34]), but<br>not for CV death (aHR 1.15<br>[0.97-1.35])                                                                             | *** |
| Böhm M <i>et al.</i> <sup>24</sup> , 2014        | RCT:<br><br>The SOLVD-treatment<br>Trial,<br><br>n= 2,569 (80.4% men)<br>multinational patients                                       | 3.12<br>years      | Clinical;<br>echocardiographic               | Medical records; the<br>prevalence of DM was<br>25.8%                                                               | Mean LVEF<br>24.9% | 961   | None                                                                                                                                                                                   | DM was an independent risk<br>factor for all-cause death<br>(uHR 1.30 [1.13-1.50]), CV<br>death uHR 1.32 [1.14-1.53]),<br>HF hospitalization (uHR 1.32<br>[1.18-1.48]) and for the<br>combined of all-cause death |     |

SUPPLEMENTARY DATA

|                                                  |                                                                                                                                                                         |                     |                                              |                                                                                                                                                                     |                                                                  |       |                                                                                                                                                       |                                                                                                                                                                                                                                        |     |
|--------------------------------------------------|-------------------------------------------------------------------------------------------------------------------------------------------------------------------------|---------------------|----------------------------------------------|---------------------------------------------------------------------------------------------------------------------------------------------------------------------|------------------------------------------------------------------|-------|-------------------------------------------------------------------------------------------------------------------------------------------------------|----------------------------------------------------------------------------------------------------------------------------------------------------------------------------------------------------------------------------------------|-----|
|                                                  | with chronic HF.<br>Mean age: 61.1 years                                                                                                                                |                     |                                              |                                                                                                                                                                     |                                                                  |       |                                                                                                                                                       | or HF hospitalization (uHR 1.43 [1.27-1.61])                                                                                                                                                                                           |     |
| Komajda M <i>et al.</i> <sup>25</sup> , 2015     | RCT:<br>SHIFT Trial,<br>n= 6,505 (76.4% men)<br>European patients with chronic HF. Mean age: 61 years                                                                   | 3 years             | Clinical;<br>echocardiographic               | Medical records; the prevalence of DM was 30%                                                                                                                       | Mean LVEF 29%                                                    | 1,055 | Age, SBP, heart rate, eGFR, LVEF, NYHA class, IHD, medications                                                                                        | DM was an independent risk factor for HF hospitalization (aHR 1.28 [1.13-1.44]) but not for all-cause death (aHR 1.10 [0.96-1.25]) and for CV death (aHR 1.05 [0.91-1.20])                                                             | *** |
| Kristensen SL <i>et al.</i> <sup>26</sup> , 2016 | RCT<br>The PARADIGM-HF Trial,<br>n= 8,399 (78.3% men)<br>multinational patients with chronic HF. Mean age: 63years                                                      | 2.16 years (median) | Clinical;<br>echocardiographic;<br>NT-proBNP | Medical records or HbA1c $\geq$ 6.5%; the prevalence of DM was 35%                                                                                                  | Mean LVEF 30%                                                    | 1,525 | Age, sex, race, geographical region, heart failure duration, NYHA class, LVEF, heart rate, KCCQ score, BMI, eGFR, NT-proBNP, previous IHD, stroke, AF | DM was an independent risk factor for all-cause death (aHR 1.46 [1.26-1.70]), CV death (aHR 1.54 [1.30-1.83]), HF hospitalization (aHR 1.90 [1.59-2.27]) and for the combined of CV death or HF hospitalization (uHR 1.73 [1.54-1.95]) | *** |
| Dauriz M <i>et al.</i> <sup>27</sup> , 2017      | RCT:<br>GISSI-HF Trial,<br>n= 6,935 (78.5% men)<br>Italian patients with chronic HF.<br>Mean age: 67 years                                                              | 3.9 years (median)  | Clinical;<br>echocardiographic               | Medical records, or use insulin and/or oral glucose-lowering agents, or fasting glucose levels $\geq$ 7 mmol/L or HbA1c $\geq$ 6.5%; the prevalence of DM was 41.1% | Mean LVEF 33%; the percentage of patients with LVEF>35% was 9.5% | 1,958 | Age, sex, BMI, heart rate, SBP, creatinine, total cholesterol, smoking status, hypertension, AF, COPD, NYHA class, HF etiology, LVEF                  | DM was an independent risk factor for all-cause death (aHR 1.43 [1.28-1.60]) and for the combined of all-cause death or CV hospitalization (aHR 1.23 [1.13-1.32])                                                                      | *** |
| <b>Registries</b>                                |                                                                                                                                                                         |                     |                                              |                                                                                                                                                                     |                                                                  |       |                                                                                                                                                       |                                                                                                                                                                                                                                        |     |
| O'Connor CM <i>et al.</i> <sup>28</sup> , 2000   | Registry:<br>The Duke Cardiovascular Databank,<br>n= 2,498 (45% men)<br>American consecutive patients with HF, who underwent cardiac catheterization between 1984 1996. | 5 years             | Clinical;<br>echocardiographic               | Medical records, use of insulin and/or oral glucose-lowering agents, fasting glucose levels $\geq$ 7 mmol/L; the prevalence of DM was 28%                           | Median LVEF 58%                                                  | 699   | IHD, race, NYHA class, peripheral vascular disease, LVEF                                                                                              | DM was an independent risk factor for all-cause death (aHR 1.38 [1.19-1.57])                                                                                                                                                           | *   |



SUPPLEMENTARY DATA

|                                                    |                                                                                                                                                       |                           |                                                                  |                                                                                                                                                       |                                                                       |     |                                                                                                                                            |                                                                                                                                                                                                                                               |    |
|----------------------------------------------------|-------------------------------------------------------------------------------------------------------------------------------------------------------|---------------------------|------------------------------------------------------------------|-------------------------------------------------------------------------------------------------------------------------------------------------------|-----------------------------------------------------------------------|-----|--------------------------------------------------------------------------------------------------------------------------------------------|-----------------------------------------------------------------------------------------------------------------------------------------------------------------------------------------------------------------------------------------------|----|
|                                                    | Mean age: 63 years                                                                                                                                    |                           |                                                                  |                                                                                                                                                       |                                                                       |     |                                                                                                                                            |                                                                                                                                                                                                                                               |    |
| Bobbio M <i>et al.</i> <sup>29</sup> , 2003        | Registry:<br>BRING-UP Study,<br>n= 2,843 (73.7% men)<br>Italian patients with<br>chronic HF.<br><br>Mean age: 63.7 years                              | 1 year                    | Clinical;<br>echocardiographic                                   | Hypoglycemic diet, or use<br>of insulin and/or oral<br>glucose-lowering agents;<br>the prevalence of DM was<br>21.8%                                  | Mean LVEF<br>34%                                                      | 341 | Age, SBP, heart rate, NYHA<br>class, LVEF, medications                                                                                     | DM was an independent risk<br>factor for all-cause death<br>(aHR 1.40 [1.10-1.78]), all-<br>cause hospitalization (uHR<br>1.28 [1.11-1.49]) and for the<br>combined all-cause death or<br>all-cause hospitalization (uHR<br>1.35 [1.19-1.51]) | *  |
| De Groote P <i>et al.</i> <sup>30</sup> ,<br>2004  | Registry:<br><br>n= 1,246 (84.7% men)<br>French consecutive<br>patients with chronic<br>HF.<br><br>Mean age: 53.8 years                               | 3.29<br>years<br>(median) | Clinical;<br>echocardiographic                                   | Medical records, use of<br>insulin and/or oral glucose-<br>lowering agents, fasting<br>glucose levels >7 mmol/L;<br>the prevalence of DM was<br>22.4% | Mean LVEF<br>33%                                                      | 385 | Age, HF etiology, NYHA<br>class, LVEF, peak VO <sub>2</sub> ,<br>medications                                                               | DM was not an independent<br>risk factor for CV death (aHR<br>1.06 [0.80-1.41])                                                                                                                                                               | *  |
| Henkel DM <i>et al.</i> <sup>31</sup> ,<br>2008    | Registry:<br><br>n= 1,063 (46% men)<br>American community<br>patients with HF.<br><br>Mean age: 76.4 years                                            | 4.3 years<br>(median)     | ICD-9 codes;<br>clinical; radiologic<br>(Framingham<br>criteria) | Two consecutive fasting<br>glucose levels ≥7.7<br>mmol/L, or 2-hour glucose<br>levels ≥11.1 mmol/L; the<br>prevalence of DM was 19%                   | The<br>percentage<br>of patients<br><br>with<br>LVEF>35%<br>was 45%   | 917 | Age, sex, smoking status,<br>IHD, CKD, LVEF                                                                                                | DM was an independent risk<br>factor for all-cause death<br>(aHR 1.44 [1.21-1.71]) and<br>for CV death (aHR 1.46 [1.16-<br>1.82])                                                                                                             | *  |
| Gustafsson F <i>et al.</i> <sup>32</sup> ,<br>2009 | Registry:<br><br>n= 4,012 (71% men)<br>Danish consecutive<br>outpatients referred<br>for HF management in<br>18 HF clinics.<br><br>Mean age: 69 years | 1.58<br>years             | Clinical;<br>echocardiographic                                   | Medical records; the<br>prevalence of DM was 17%                                                                                                      | The<br>percentage<br>of patients<br><br>with<br>LVEF>35%<br>was 17%   | 703 | Age, sex, NYHA, class,<br>creatinine, LVEF, HF<br>duration and etiology,<br>SBP, heart rate,<br>hospitalization within the<br>last 90 days | DM was an independent risk<br>factor for the combined of<br>all-cause death or HF<br>hospitalization (aHR 1.21<br>[1.03-1.42])                                                                                                                | ** |
| Lee R <i>et al.</i> <sup>33</sup> , 2010           | Registry:<br><br>National Healthcare<br>Group Multi-<br>disciplinary Heart<br>Failure Disease<br>Management Program,<br><br>n= 1,668 (67% men)        | 3 years                   | Clinical                                                         | Medical records, or use of<br>insulin and/or oral glucose-<br>lowering agents;<br><br>the prevalence of DM was<br>50.2%                               | The<br>percentage<br>of patients<br><br>with<br>LVEF>35%<br>was 11.8% | 223 | Age, marital status,<br>education, IHD,<br>hypertension, stroke,<br>eGFR, NYHA class,<br>medications                                       | DM was an independent risk<br>factor for all-cause death<br>(aHR 1.70 [1.19-2.66])                                                                                                                                                            | ** |

## SUPPLEMENTARY DATA

|                                                     |                                                                                                                                                     |                     |                                          |                                                                                                        |                                                  |        |                                                                                                                                                                                                                                                         |                                                                                                                                                       |     |
|-----------------------------------------------------|-----------------------------------------------------------------------------------------------------------------------------------------------------|---------------------|------------------------------------------|--------------------------------------------------------------------------------------------------------|--------------------------------------------------|--------|---------------------------------------------------------------------------------------------------------------------------------------------------------------------------------------------------------------------------------------------------------|-------------------------------------------------------------------------------------------------------------------------------------------------------|-----|
|                                                     | Singaporean patients with chronic HF. Mean age: 64.9 years                                                                                          |                     |                                          |                                                                                                        |                                                  |        |                                                                                                                                                                                                                                                         |                                                                                                                                                       |     |
| De Blois J <i>et al.</i> <sup>34</sup> , 2010       | Registry:<br><br>Norwegian Heart Failure Registry<br><br>n= 4,132 (71% men) Norwegian patients with HF from 22 hospitals.<br><br>Mean age: 71 years | 1.1 years           | Clinical; echocardiographic              | Medical records; the prevalence of DM was 20.1%                                                        | Mean LVEF 32%                                    | 1,083  | Age, NYHA class, COPD, creatinine, medications                                                                                                                                                                                                          | DM was an independent risk factor for all-cause death (aHR 1.39 [1.20-1.60])                                                                          | *   |
| Ather S <i>et al.</i> <sup>35</sup> , 2012          | Registry:<br><br>n= 9,442 (94.8% men) American patients with chronic HF. Mean age: 70 years                                                         | Up to 2 years       | ICD-9 codes; clinical; echocardiographic | Medical records; the prevalence of DM was 41.5%                                                        | The percentage of patients with LVEF>35% was 30% | 2,243  | Age, sex, SBP, Na, previous HF hospitalization, hypertension, peripheral vascular disease, stroke, CKD, anemia, COPD, obesity, liver disease, cancer, AIDS, dementia, psychiatric disorder, rheumatological disorder, peptic ulcer disease, medications | DM was an independent risk factor for all-cause death in patients with HFrEF (aHR 1.25[1.13-1.38]) but not in those with HFpEF (aHR 1.03 [0.86-1.24]) | **  |
| MAGGIC Investigators <sup>36</sup> , 2012           | MAGGIC Meta-analysis,<br><br>n= 41,972 (61.2% men) multinational patients with chronic HF. Mean age: 68 years                                       | 2.75 years (median) | Clinical; echocardiographic              | Medical records; the prevalence of DM was 23.0%                                                        | Mean LVEF 38%                                    | 10,754 | Age, sex, HF etiology, AF, hypertension, LVEF                                                                                                                                                                                                           | DM was an independent risk factor for all-cause death (aHR 1.41 [1.35-1.47]) and for CV death (aHR 1.51 [1.41-1.62])                                  | *** |
| Cubbon RM <i>et al.</i> <sup>37</sup> , 2013        | Registry:<br><br>n= 1,091 (73.6% men) British patients with chronic HF.<br><br>Mean age: 68 years                                                   | 2.63 years          | Clinical; echocardiographic              | Medical records, or use of insulin and/or oral glucose-lowering agents; the prevalence of DM was 25.7% | Mean LVEF 32%                                    | 251    | Age, sex, HF etiology, NYHA class, LVEF, hemoglobin, Na, eGFR, medications                                                                                                                                                                              | DM was an independent risk factor for all-cause death (aHR 1.72 [1.29-2.28]) and for CV death (aHR 2.00 [1.40-2.86])                                  | **  |
| Frigola-Capell E <i>et al.</i> <sup>38</sup> , 2013 | Registry:<br><br>n= 5,659 (40% men) Spanish outpatients                                                                                             | Up to 3 years       | ICD-10 codes                             | Medical records; the prevalence of DM was 29.8%                                                        | NA                                               | 950    | Age, hypertension, IHD, CKD                                                                                                                                                                                                                             | DM was an independent risk factor for all-cause death (aHR 1.53 [1.33-1.76])                                                                          | *   |

## SUPPLEMENTARY DATA

|                                                |                                                                                                                               |                     |                                          |                                                                                                                                                                          |                                                                   |       |                                                                                                                                                                |                                                                                                                                                                          |     |
|------------------------------------------------|-------------------------------------------------------------------------------------------------------------------------------|---------------------|------------------------------------------|--------------------------------------------------------------------------------------------------------------------------------------------------------------------------|-------------------------------------------------------------------|-------|----------------------------------------------------------------------------------------------------------------------------------------------------------------|--------------------------------------------------------------------------------------------------------------------------------------------------------------------------|-----|
|                                                | with HF.<br>Mean age: 77 years                                                                                                |                     |                                          |                                                                                                                                                                          |                                                                   |       |                                                                                                                                                                |                                                                                                                                                                          |     |
| Gotsman I <i>et al.</i> <sup>39</sup> , 2014   | Registry:<br>n=6,067 (51% men)<br>Israeli patients with chronic HF.<br>Mean age: 75 years                                     | 1.33 years (median) | ICD-9 codes; clinical; echocardiographic | Medical records; the prevalence of DM was 50.5%                                                                                                                          | The percentage of patients with LVEF>35% was 85.9%                | 761   | Age, sex, hyperlipidaemia, hypertension, BMI, heart rate, urea, eGFR, Na, hemoglobin, medications                                                              | DM was an independent risk factor for all-cause death (aHR 1.48 [1.13-1.95]) and for the combined of all-cause or CV hospitalization (aHR 1.27 [1.12-1.43])              | *   |
| Johansson I <i>et al.</i> <sup>40</sup> , 2014 | Registry:<br>Swedish Heart Failure Registry,<br>n= 36,276 (60.6% men)<br>Swedish patients with chronic HF. Mean age: 75 years | 1.9 years (median)  | Clinical; echocardiographic              | Medical records, or use of insulin and/or oral glucose-lowering agents; the prevalence of DM was 24.2%                                                                   | The percentage of patients with LVEF>35% was 18.5%                | 7,244 | Age, sex, duration of HF, SBP, DBP, IHD, hypertension, AF, pulmonary disease, revascularization, valvular surgery, creatinine, hemoglobin, weight, medications | DM was an independent risk factor for all-cause death (aHR 1.6 [1.5-1.71])                                                                                               | **  |
| Ushigome R <i>et al.</i> <sup>41</sup> , 2015  | Registry:<br>CHART study,<br>n= 4,682 (65.2% men)<br>Japanese patients with chronic HF. Mean age: 69 years                    | 3 years             | Clinical; echocardiographic; NT-proBNP   | Medical records, or use of insulin and/or oral glucose-lowering agents; the prevalence of DM was %                                                                       | The percentage of patients with LVEF>35% was 59.4%                | 771   | Age, BMI, heart rate, SBP, NYHA class, hyperlipidaemia, LV end-diastolic diameter, NT-proBNP, eGFR                                                             | DM was an independent risk factor for all-cause death (aHR 1.37 [1.15-1.64])                                                                                             | *   |
| Sengeløv M <i>et al.</i> <sup>42</sup> , 2015  | Registry:<br>n= 1,065 (73.6% men)<br>Danish patients with chronic HF.<br>Mean age: 67 years                                   | 3.33 years (median) | Clinical; echocardiographic              | Medical records; the prevalence of DM was 12%                                                                                                                            | Mean LVEF 27.5%                                                   | 177   | Age, hypertension, IHD, global longitudinal strain (on echocardiography)                                                                                       | DM was an independent risk factor for all-cause death (aHR 2.66 [1.55-4.30])                                                                                             | *   |
| Dauriz M <i>et al.</i> <sup>43</sup> , 2017    | Registry:<br>ESC-HFA Long-Term HF Registry,<br>n= 9,428 (72% men)<br>European patients with chronic HF.                       | 1 year              | Clinical; echocardiographic; NT-proBNP   | Medical records, or use of insulin and/or oral glucose-lowering agents, or a fasting glucose levels ≥7.0 mmol/L and/or HbA1c level ≥6.5%; the prevalence of DM was 36.5% | Mean LVEF 37%; the percentage of patients with LVEF>35% was 23.9% | 757   | Age, sex, BMI, hemoglobin, SBP, eGFR, LVEF, HF etiology, smoking status, hypertension, previous stroke, COPD, medications                                      | DM was independent risk factor for all-cause death (aHR 1.28 [1.07-1.54]) and for HF hospitalization (aHR 1.37 [1.17-1.60]), but not for CV death (aHR 1.28 [0.99-1.66]) | *** |

SUPPLEMENTARY DATA

|  |                      |  |  |  |  |  |  |  |  |
|--|----------------------|--|--|--|--|--|--|--|--|
|  | Mean age: 64.9 years |  |  |  |  |  |  |  |  |
|--|----------------------|--|--|--|--|--|--|--|--|

Note: §Degree of adjustment: 0 unadjusted; \*adjusted for age and/or sex; \*\*adjustment for age, sex, blood pressure, HF etiology and LVEF; \*\*\*, further adjustment for traditional and/or non-traditional CVD risk factors.  
Abbreviations: AF, atrial fibrillation; aHR, adjusted hazard ratio; BMI, body mass index; COPD, chronic obstructive pulmonary disease; CKD, chronic kidney disease; CV, cardiovascular; DBP, diastolic blood pressure; DM diabetes mellitus; eGFR, estimated glomerular filtrate rate; HF, heart failure; HFpEF, heart failure with preserved ejection fraction; HFrEF, heart failure with reduced ejection fraction IHD, ischemic heart disease; KCCQ, Kansas City Cardiomyopathy Questionnaire; LVEF, left ventricular ejection fraction; Na, sodium; NA, not available; NT-proBNP, N-terminal probrain natriuretic peptide; RCT, randomized controlled trial; SBP, systolic blood pressure; uHR, unadjusted hazard ratio; VO<sub>2</sub>, Oxygen Consumption.

SUPPLEMENTARY DATA

Supplementary Table S3. Sensitivity analyses – Prognostic impact of diabetes *per se* on the risk of all-cause death, cardiovascular death or hospitalization in all studies stratified by either left ventricular ejection fraction, ischemic etiology of HF or country at the study entry as well as in ‘high-quality’ observational registries according to the Newcastle-Ottawa Scale (i.e., NOS score >7).

|                                                               | All-cause death                                                                            | Cardiovascular death                                                                   | Hospitalization                                                                        |
|---------------------------------------------------------------|--------------------------------------------------------------------------------------------|----------------------------------------------------------------------------------------|----------------------------------------------------------------------------------------|
| <b>Left ventricular ejection fraction (LVEF) <sup>§</sup></b> |                                                                                            |                                                                                        |                                                                                        |
| <b>LVEF ≤35%</b>                                              | HR 1.26 (1.16-1.38)<br><i>I</i> <sup>2</sup> =74.3<br>number of studies: 12<br>N=47,344    | HR 1.26 (1.09-1.44)<br><i>I</i> <sup>2</sup> =73.1<br>number of studies: 7<br>N=26,165 | HR 1.35 (1.17-1.56)<br><i>I</i> <sup>2</sup> =78.8<br>number of studies: 3<br>N=20,554 |
| <b>LVEF &gt;35%</b>                                           | HR 1.27 (1.18-1.36)<br><i>I</i> <sup>2</sup> =70.9<br>number of studies: 11<br>N=94,012    | HR 1.46 (1.28-1.66)<br><i>I</i> <sup>2</sup> =31.7<br>number of studies: 2<br>N=51,400 | HR 1.24 (1.04-1.47)<br><i>I</i> <sup>2</sup> =66.8<br>number of studies: 3<br>N=18,130 |
| <b>HF ischemic etiology <sup>§#</sup></b>                     |                                                                                            |                                                                                        |                                                                                        |
| <b>Ischemic HF etiology ≥50% of sample</b>                    | HR 1.35 (1.24-1.47)<br><i>I</i> <sup>2</sup> =88.9<br>number of studies: 16<br>N=108,899   | HR 1.49 (1.23-1.80)<br><i>I</i> <sup>2</sup> =85.7<br>number of studies: 5<br>N=65,566 | HR 1.55 (1.26-1.90)<br><i>I</i> <sup>2</sup> =86.3<br>number of studies: 4<br>N=29,429 |
| <b>Ischemic HF etiology &lt;50% of sample</b>                 | HR 1.34 (1.18-1.52)<br><i>I</i> <sup>2</sup> =82.2<br>number of studies: 8<br>N=66,900     | HR 1.17 (0.97-1.42)<br><i>I</i> <sup>2</sup> =0.00<br>number of studies: 2<br>N=10,658 | HR 1.22 (1.03-1.45)<br><i>I</i> <sup>2</sup> =64.8<br>number of studies: 3<br>N=12,047 |
| <b>Study countries <sup>§</sup></b>                           |                                                                                            |                                                                                        |                                                                                        |
| <b>Europe</b>                                                 | HR 1.34 (1.25-1.43)<br><i>I</i> <sup>2</sup> =80.9<br>number of studies: 17<br>N=219,066   | HR 1.26 (0.98-1.61)<br><i>I</i> <sup>2</sup> =74.7<br>number of studies: 4<br>N=18,254 | HR 1.27 (1.16-1.38)<br><i>I</i> <sup>2</sup> =33.8<br>number of studies: 5<br>N=25,478 |
| <b>Middle East</b>                                            | HR 1.18 (1.02-1.36)<br><i>I</i> <sup>2</sup> =42.9<br>number of studies: 4<br>N=15,518     | not available                                                                          | not available                                                                          |
| <b>North America</b>                                          | HR 1.26 (1.16-1.38)<br><i>I</i> <sup>2</sup> =82.9<br>number of studies: 9<br>N=43,717     | HR 1.58 (1.33-1.88)<br><i>I</i> <sup>2</sup> =5.8<br>number of studies: 2<br>N=8,662   | HR 1.84 (0.54-2.15)<br>number of studies: 1<br>N=7,599                                 |
| <b>Western Pacific</b>                                        | HR 1.42 (1.21-1.67)<br><i>I</i> <sup>2</sup> =0.00<br>number of studies: 2<br>N=6,350      | not available                                                                          | not available                                                                          |
| <b>International</b>                                          | HR 1.32 (1.20-1.44)<br><i>I</i> <sup>2</sup> =87.9<br>number of studies: 6<br>N=69,581     | HR 1.33 (1.17-1.52)<br><i>I</i> <sup>2</sup> =75.5<br>number of studies: 5<br>N=59,311 | HR 1.41 (1.06-1.86)<br><i>I</i> <sup>2</sup> =88.2<br>number of studies: 3<br>N=13,206 |
| <b>High-quality studies on NOS score</b>                      |                                                                                            |                                                                                        |                                                                                        |
| <b>N=21 studies*</b>                                          | HR 1.29 (1.19-1.40)<br><i>I</i> <sup>2</sup> =89.4<br>number of studies: 18<br>N=153,786*  | HR 1.31 (1.06-1.63)<br><i>I</i> <sup>2</sup> =70.5<br>number of studies: 3<br>N=52,630 | HR 1.26 (1.12-1.41)<br><i>I</i> <sup>2</sup> =50.3<br>number of studies: 4<br>N=18,973 |
| <b>N=22 studies**</b>                                         | HR 1.24 (1.13-1.36)<br><i>I</i> <sup>2</sup> =92.9<br>number of studies: 19<br>N=170,152** | HR 1.31 (1.06-1.63)<br><i>I</i> <sup>2</sup> =70.5<br>number of studies: 3<br>N=52,630 | HR 1.26 (1.12-1.41)<br><i>I</i> <sup>2</sup> =50.3<br>number of studies: 4<br>N=18,973 |

## SUPPLEMENTARY DATA

§ Without Sengeløv M. *et al.*<sup>42</sup> and Teng TH *et al.*<sup>12</sup>; #The 50% prevalence cut-off for ischemic HF etiology was calculated as median prevalence among the 28 studies with available data. \*Without Teng TH *et al.*<sup>12</sup>; \*\*With Teng TH *et al.*

**Supplementary Table S4. Newcastle-Ottawa quality assessment scale (NOS) for observational registries.**

| Author                                               | Selection | Comparability | Exposure/outcome |
|------------------------------------------------------|-----------|---------------|------------------|
| Varadarajan P. <i>et al.</i> <sup>5</sup> , 2006     | ****      | **            | ***              |
| Harjola V.P. <i>et al.</i> <sup>9</sup> , 2010       | ****      | **            | ***              |
| Ather S. <i>et al.</i> <sup>35</sup> , 2012          | ****      | **            | ***              |
| MAGGIC Investigators <sup>36</sup> , 2012            | ****      | **            | ***              |
| Spinar J. <i>et al.</i> <sup>15</sup> , 2016         | ****      | **            | ***              |
| Targher G. <i>et al.</i> <sup>17</sup> , 2017        | ****      | **            | ***              |
| Targher G. <i>et al.</i> <sup>16</sup> , 2016        | ****      | **            | ***              |
| Dauriz M. <i>et al.</i> <sup>43</sup> , 2017         | ****      | **            | ***              |
| Bobbio M. <i>et al.</i> <sup>29</sup> , 2003         | ****      | *             | ***              |
| De Groote P. <i>et al.</i> <sup>30</sup> , 2004      | ****      | *             | ***              |
| Varela-Roman A. <i>et al.</i> <sup>3</sup> , 2005    | ****      | **            | **               |
| Owan T.E. <i>et al.</i> <sup>4</sup> , 2006          | ***       | **            | ***              |
| Ouzounian M. <i>et al.</i> <sup>6</sup> , 2007       | ****      | *             | ***              |
| Gustafsson F. <i>et al.</i> <sup>32</sup> , 2009     | ****      | **            | ***              |
| Barsheshet A. <i>et al.</i> <sup>8</sup> , 2010      | ****      | **            | **               |
| Lee R. <i>et al.</i> <sup>33</sup> , 2010            | ***       | **            | ***              |
| Frigola-Capell E. <i>et al.</i> <sup>38</sup> , 2013 | ****      | *             | ***              |
| Johansson I. <i>et al.</i> <sup>40</sup> , 2014      | ***       | **            | ***              |
| Shah R. <i>et al.</i> <sup>10</sup> , 2014           | ***       | **            | ***              |
| Ushigome R. <i>et al.</i> <sup>41</sup> , 2015       | ****      | *             | ***              |
| Teng T.H. <i>et al.</i> <sup>12</sup> , 2015         | ***       | **            | ***              |
| O'Connor C.M. <i>et al.</i> <sup>28</sup> , 2000     | **        | *             | ***              |
| Henkel D.M. <i>et al.</i> <sup>31</sup> , 2008       | ****      | *             | ***              |
| MacDonald M.R. <i>et al.</i> <sup>7</sup> , 2008     | ***       | *             | **               |
| De Blois J. <i>et al.</i> <sup>34</sup> , 2010       | ****      | *             | **               |
| Cubbon R.M. <i>et al.</i> <sup>37</sup> , 2013       | **        | **            | ***              |
| Alhabib K. <i>et al.</i> <sup>11</sup> , 2014        | ***       | *             | **               |
| Gotsman I. <i>et al.</i> <sup>39</sup> , 2014        | ***       | *             | ***              |
| Helfand B.K. <i>et al.</i> <sup>13</sup> , 2015      | ***       | *             | ***              |
| Khafaji H.A. <i>et al.</i> <sup>14</sup> , 2015      | **        | **            | **               |
| Sengeløv M. <i>et al.</i> <sup>42</sup> , 2015       | **        | *             | ***              |

**Note:** Comparability category: age, sex, blood pressure, HF etiology and baseline LVEF were arbitrarily considered as the minimum required number of covariates for adjustment to assess the quality of individual studies.

## SUPPLEMENTARY DATA

### REFERENCES

1. Gustafsson I, Brendorp B, Seibaek M, Burchardt H, Hildebrandt P, Kober L, et al. Influence of diabetes and diabetes-gender interaction on the risk of death in patients hospitalized with congestive heart failure. *J Am Coll Cardiol*. 2004;43(5):771-777.
2. Deedwania PC, Ahmed MI, Feller MA, Aban IB, Love TE, Pitt B, et al. Impact of diabetes mellitus on outcomes in patients with acute myocardial infarction and systolic heart failure. *Eur J Heart Fail*. 2011;13(5):551-559.
3. Varela-Roman A, Grigorian Shamagian L, Barge Caballero E, Mazon Ramos P, Rigueiro Veloso P, Gonzalez-Juanatey JR. Influence of diabetes on the survival of patients hospitalized with heart failure: a 12-year study. *Eur J Heart Fail*. 2005;7(5):859-864.
4. Owan TE, Hodge DO, Herges RM, Jacobsen SJ, Roger VL, Redfield MM. Trends in prevalence and outcome of heart failure with preserved ejection fraction. *N Engl J Med*. 2006;355(3):251-259.
5. Varadarajan P, Gandhi S, Sharma S, Umakanthan B, Pai RG. Prognostic significance of hemoglobin level in patients with congestive heart failure and normal ejection fraction. *Clin Cardiol*. 2006;29(10):444-449.
6. Ouzounian M, Hassan A, Cox JL, Johnstone DE, Howlett J, Improving Cardiovascular Outcomes in Nova Scotia Study I. The effect of spironolactone use on heart failure mortality: a population-based study. *J Card Fail*. 2007;13(3):165-169.
7. MacDonald MR, Jhund PS, Petrie MC, Lewsey JD, Hawkins NM, Bhagra S, et al. Discordant short- and long-term outcomes associated with diabetes in patients with heart failure: importance of age and sex: a population study of 5.1 million people in Scotland. *Circ Heart Fail*. 2008;1(4):234-241.
8. Barsheshet A, Shotan A, Cohen E, Garty M, Goldenberg I, Sandach A, et al. Predictors of long-term (4-year) mortality in elderly and young patients with acute heart failure. *Eur J Heart Fail*. 2010;12(8):833-840.
9. Harjola VP, Follath F, Nieminen MS, Brutsaert D, Dickstein K, Drexler H, et al. Characteristics, outcomes, and predictors of mortality at 3 months and 1 year in patients hospitalized for acute heart failure. *Eur J Heart Fail*. 2010;12(3):239-248.
10. Shah R, Gayat E, Januzzi JL, Jr., Sato N, Cohen-Solal A, diSomma S, et al. Body mass index and mortality in acutely decompensated heart failure across the world: a global obesity paradox. *J Am Coll Cardiol*. 2014;63(8):778-785.
11. AlHabib KF, Elasfar AA, Alfaleh H, Kashour T, Hersi A, AlBackr H, et al. Clinical features, management, and short- and long-term outcomes of patients with acute decompensated heart failure: phase I results of the HEARTS database. *Eur J Heart Fail*. 2014;16(4):461-469.
12. Teng TH, Katzenellenbogen JM, Hung J, Knuiman M, Sanfilippo FM, Geelhoed E, et al. A cohort study: temporal trends in prevalence of antecedents, comorbidities and mortality in Aboriginal and non-Aboriginal Australians with first heart failure hospitalization, 2000-2009. *Int J Equity Health*. 2015;14:66.
13. Helfand BK, Maselli NJ, Lessard DM, Yarzelski J, Gore JM, McManus DD, et al. Elevated serum glucose levels and survival after acute heart failure: a population-based perspective. *Diab Vasc Dis Res*. 2015;12(2):119-125.
14. Khafaji HA, Sulaiman K, Singh R, AlHabib KF, Asaad N, Alsheikh-Ali A, et al. Clinical characteristics, precipitating factors, management and outcome of patients with prior stroke hospitalised with heart failure: an observational report from the Middle East. *BMJ Open*. 2015;5(4):e007148.
15. Spinar J, Jarkovsky J, Spinarova L, Mebazaa A, Gayat E, Vitovec J, et al. AHEAD score--Long-term risk classification in acute heart failure. *Int J Cardiol*. 2016;202:21-26.
16. Targher G, Dauriz M, Tavazzi L, Temporelli PL, Lucci D, Urso R, et al. Prognostic impact of in-hospital hyperglycemia in hospitalized patients with acute heart failure: Results of the IN-HF (Italian Network on Heart Failure) Outcome registry. *Int J Cardiol*. 2016;203:587-593.
17. Targher G, Dauriz M, Laroche C, Temporelli PL, Hassanein M, Seferovic PM, et al. In-hospital and 1-year mortality associated with diabetes in patients with acute heart failure: results from the ESC-HFA Heart Failure Long-Term Registry. *Eur J Heart Fail*. 2017;19(1):54-65.
18. Torp-Pedersen C, Metra M, Charlesworth A, Spark P, Lukas MA, Poole-Wilson PA, et al. Effects of metoprolol and carvedilol on pre-existing and new onset diabetes in patients with chronic heart failure: data from the Carvedilol Or Metoprolol European Trial (COMET). *Heart*. 2007;93(8):968-973.
19. MacDonald MR, Petrie MC, Varyani F, Ostergren J, Michelson EL, Young JB, et al. Impact of diabetes on outcomes in patients with low and preserved ejection fraction heart failure: an analysis of the Candesartan in Heart failure: Assessment of Reduction in Mortality and morbidity (CHARM) programme. *Eur Heart J*. 2008;29(11):1377-1385.
20. Wedel H, McMurray JJ, Lindberg M, Wikstrand J, Cleland JG, Cornel JH, et al. Predictors of fatal and non-fatal outcomes in the Controlled Rosuvastatin Multinational Trial in Heart Failure (CORONA): incremental value of

## SUPPLEMENTARY DATA

- apolipoprotein A-1, high-sensitivity C-reactive peptide and N-terminal pro B-type natriuretic peptide. *Eur J Heart Fail.* 2009;11(3):281-291.
21. de Boer RA, Doehner W, van der Horst IC, Anker SD, Babalis D, Roughton M, et al. Influence of diabetes mellitus and hyperglycemia on prognosis in patients > or =70 years old with heart failure and effects of nebivolol (data from the Study of Effects of Nebivolol Intervention on Outcomes and Rehospitalization in Seniors with heart failure [SENIORS]). *Am J Cardiol.* 2010;106(1):78-86 e71.
  22. Komajda M, Carson PE, Hetzel S, McKelvie R, McMurray J, Ptaszynska A, et al. Factors associated with outcome in heart failure with preserved ejection fraction: findings from the Irbesartan in Heart Failure with Preserved Ejection Fraction Study (I-PRESERVE). *Circ Heart Fail.* 2011;4(1):27-35.
  23. Sarma S, Mentz RJ, Kwasny MJ, Fought AJ, Huffman M, Subacius H, et al. Association between diabetes mellitus and post-discharge outcomes in patients hospitalized with heart failure: findings from the EVEREST trial. *Eur J Heart Fail.* 2013;15(2):194-202.
  24. Bohm M, Pogue J, Kindermann I, Poss J, Koon T, Yusuf S. Effect of comorbidities on outcomes and angiotensin converting enzyme inhibitor effects in patients with predominantly left ventricular dysfunction and heart failure. *Eur J Heart Fail.* 2014;16(3):325-333.
  25. Komajda M, Tavazzi L, Francq BG, Bohm M, Borer JS, Ford I, et al. Efficacy and safety of ivabradine in patients with chronic systolic heart failure and diabetes: an analysis from the SHIFT trial. *Eur J Heart Fail.* 2015;17(12):1294-1301.
  26. Kristensen SL, Preiss D, Jhund PS, Squire I, Cardoso JS, Merkely B, et al. Risk Related to Pre-Diabetes Mellitus and Diabetes Mellitus in Heart Failure With Reduced Ejection Fraction: Insights From Prospective Comparison of ARNI With ACEI to Determine Impact on Global Mortality and Morbidity in Heart Failure Trial. *Circ Heart Fail.* 2016;9(1).
  27. Dauriz M, Targher G, Temporelli P, Lucci D, Gonzini L, Nicolosi G, et al. Prognostic Impact of Diabetes and Prediabetes on Survival Outcome in Patients with Chronic Heart Failure: A Post-Hoc Analysis of the GISSI-HF Trial. *JAMA, in press.* 2017.
  28. O'Connor CM, Gattis WA, Shaw L, Cuffe MS, Califf RM. Clinical characteristics and long-term outcomes of patients with heart failure and preserved systolic function. *Am J Cardiol.* 2000;86(8):863-867.
  29. Bobbio M, Ferrua S, Opasich C, Porcu M, Lucci D, Scherillo M, et al. Survival and hospitalization in heart failure patients with or without diabetes treated with beta-blockers. *J Card Fail.* 2003;9(3):192-202.
  30. De Groote P, Lamblin N, Mouquet F, Plichon D, McFadden E, Van Belle E, et al. Impact of diabetes mellitus on long-term survival in patients with congestive heart failure. *Eur Heart J.* 2004;25(8):656-662.
  31. Henkel DM, Redfield MM, Weston SA, Gerber Y, Roger VL. Death in heart failure: a community perspective. *Circ Heart Fail.* 2008;1(2):91-97.
  32. Gustafsson F, Schou M, Videbaek L, Dridi N, Ryde H, Handberg J, et al. Incidence and predictors of hospitalization or death in patients managed in multidisciplinary heart failure clinics. *Eur J Heart Fail.* 2009;11(4):413-419.
  33. Lee R, Chan SP, Wong J, Lau D, Ho KT, Ng K. Impact of diabetes mellitus on survival in South East Asian patients with congestive heart failure due to left ventricular systolic dysfunction. *Int J Cardiol.* 2010;142(1):97-100.
  34. De Blois J, Simard S, Atar D, Agewall S, Norwegian Heart Failure R. COPD predicts mortality in HF: the Norwegian Heart Failure Registry. *J Card Fail.* 2010;16(3):225-229.
  35. Ather S, Chan W, Bozkurt B, Aguilar D, Ramasubbu K, Zachariah AA, et al. Impact of noncardiac comorbidities on morbidity and mortality in a predominantly male population with heart failure and preserved versus reduced ejection fraction. *J Am Coll Cardiol.* 2012;59(11):998-1005.
  36. Meta-analysis Global Group in Chronic Heart Failure. The survival of patients with heart failure with preserved or reduced left ventricular ejection fraction: an individual patient data meta-analysis. *Eur Heart J.* 2012;33(14):1750-1757.
  37. Cubbon RM, Adams B, Rajwani A, Mercer BN, Patel PA, Gherardi G, et al. Diabetes mellitus is associated with adverse prognosis in chronic heart failure of ischaemic and non-ischaemic aetiology. *Diab Vasc Dis Res.* 2013;10(4):330-336.
  38. Frigola-Capell E, Comin-Colet J, Davins-Miralles J, Gich-Saladich IJ, Wensing M, Verdu-Rotellar JM. Survival in Mediterranean ambulatory patients with chronic heart failure. A population-based study. *Rev Esp Cardiol (Engl Ed).* 2013;66(7):539-544.
  39. Gotsman I, Shauer A, Lotan C, Keren A. Impaired fasting glucose: a predictor of reduced survival in patients with heart failure. *Eur J Heart Fail.* 2014;16(11):1190-1198.
  40. Johansson I, Edner M, Dahlstrom U, Nasman P, Ryden L, Norhammar A. Is the prognosis in patients with diabetes and heart failure a matter of unsatisfactory management? An observational study from the Swedish Heart Failure Registry. *Eur J Heart Fail.* 2014;16(4):409-418.



## SUPPLEMENTARY DATA

41. Ushigome R, Sakata Y, Nochioka K, Miyata S, Miura M, Tadaki S, et al. Temporal trends in clinical characteristics, management and prognosis of patients with symptomatic heart failure in Japan -- report from the CHART Studies. *Circ J*. 2015;79(11):2396-2407.
42. Sengelov M, Jorgensen PG, Jensen JS, Bruun NE, Olsen FJ, Fritz-Hansen T, et al. Global Longitudinal Strain Is a Superior Predictor of All-Cause Mortality in Heart Failure With Reduced Ejection Fraction. *JACC Cardiovasc Imaging*. 2015;8(12):1351-1359.
43. Dauriz M, Targher G, Laroche C, Temporelli PL, Ferrari R, Anker S, et al. Association Between Diabetes and 1-Year Adverse Clinical Outcomes in a Multinational Cohort of Ambulatory Patients With Chronic Heart Failure: Results From the ESC-HFA Heart Failure Long-Term Registry. *Diabetes Care*. 2017; 40(5):671-678.
